# Supplementary material for: Diversity of Fish Species in relation to Climatological Fluctuations in a Coastal River of Bangladesh
Source: Hindawi journal article supplement (doi:10.1155/2023/6662387), 2023-10-31
Supplement: f1 [file 6662387.f1.docx]

**Table S1.** Temporal and spatial abundance and distribution of fish species in the Sandha river of Bangladesh.

| **Species** | **St 1** | **St 2** | **St 3** | **St 4** | **St 5** | **Jul** | **Aug** | **Sep** | **Oct** | **Nov** | **Dec** | **Jan** | **Feb** | **Mar** | **Apr** | **May** | **Jun** |
| --- | --- | --- | --- | --- | --- | --- | --- | --- | --- | --- | --- | --- | --- | --- | --- | --- | --- |
| *Anabas testudineus* | 8 | 11 | 10 | 9 | 6 | 7 | 5 | 7 | 3 | 3 | 5 | 4 | 2 | 0 | 3 | 1 | 4 |
| *Channa punctata* | 5 | 8 | 9 | 9 | 7 | 3 | 3 | 2 | 4 | 3 | 1 | 4 | 2 | 6 | 3 | 2 | 5 |
| *Channa striata* | 6 | 9 | 5 | 7 | 8 | 5 | 3 | 3 | 6 | 1 | 1 | 3 | 4 | 2 | 2 | 1 | 4 |
| *Channa orientalis* | 3 | 6 | 6 | 5 | 4 | 4 | 0 | 1 | 1 | 2 | 3 | 1 | 3 | 5 | 2 | 0 | 2 |
| *Nandus nandus* | 9 | 10 | 13 | 12 | 7 | 1 | 1 | 4 | 3 | 7 | 6 | 9 | 6 | 5 | 3 | 4 | 2 |
| *Trichogaster fasciata* | 15 | 18 | 17 | 18 | 14 | 6 | 3 | 4 | 2 | 6 | 7 | 15 | 11 | 9 | 10 | 6 | 3 |
| *Xenentodon cancila* | 8 | 13 | 10 | 11 | 7 | 4 | 6 | 3 | 3 | 6 | 2 | 3 | 1 | 6 | 3 | 6 | 6 |
| *Lates calcarifer* | 15 | 8 | 5 | 9 | 13 | 4 | 6 | 2 | 3 | 2 | 3 | 5 | 6 | 4 | 7 | 3 | 5 |
| *Tenualosa ilisha* | 64 | 21 | 15 | 25 | 57 | 21 | 25 | 17 | 22 | 15 | 11 | 14 | 9 | 9 | 12 | 9 | 18 |
| *Gudusia chapra* | 25 | 16 | 10 | 17 | 27 | 13 | 7 | 5 | 2 | 8 | 3 | 5 | 6 | 3 | 16 | 12 | 15 |
| *Tenualosa toli* | 46 | 24 | 18 | 28 | 35 | 15 | 17 | 12 | 18 | 17 | 10 | 15 | 10 | 6 | 13 | 7 | 11 |
| *Gonialosa manmina* | 34 | 20 | 15 | 18 | 28 | 10 | 6 | 9 | 12 | 11 | 7 | 9 | 10 | 7 | 8 | 14 | 12 |
| *Corica soborna* | 86 | 52 | 39 | 66 | 79 | 32 | 28 | 38 | 15 | 19 | 26 | 20 | 23 | 18 | 24 | 38 | 41 |
| *Setipinna phasa* | 41 | 23 | 21 | 26 | 37 | 14 | 12 | 13 | 11 | 9 | 8 | 9 | 10 | 15 | 12 | 18 | 17 |
| *Thryssa purava* | 40 | 18 | 19 | 31 | 35 | 11 | 15 | 7 | 16 | 11 | 10 | 6 | 3 | 17 | 19 | 12 | 16 |
| *Acanthocobitis botia* | 10 | 17 | 18 | 12 | 11 | 6 | 9 | 8 | 8 | 4 | 5 | 3 | 1 | 7 | 4 | 5 | 8 |
| *Puntius sophore* | 57 | 54 | 69 | 64 | 38 | 27 | 23 | 28 | 16 | 21 | 24 | 18 | 22 | 18 | 27 | 22 | 36 |
| *Systomus sarana* | 2 | 3 | 5 | 2 | 2 | 3 | 1 | 2 | 2 | 0 | 0 | 2 | 1 | 0 | 0 | 0 | 3 |
| *Pethia ticto* | 17 | 24 | 29 | 28 | 23 | 13 | 9 | 19 | 11 | 6 | 4 | 7 | 5 | 14 | 4 | 12 | 17 |
| *Puntius chola* | 26 | 32 | 30 | 26 | 21 | 8 | 17 | 16 | 19 | 12 | 5 | 8 | 9 | 8 | 6 | 11 | 16 |
| *Pethia conchonius* | 23 | 20 | 38 | 26 | 21 | 8 | 6 | 14 | 11 | 15 | 13 | 9 | 14 | 7 | 13 | 6 | 12 |
| *Puntius terio* | 4 | 7 | 6 | 8 | 3 | 4 | 4 | 2 | 0 | 3 | 5 | 0 | 1 | 1 | 3 | 0 | 5 |
| *Esomus danrica* | 25 | 21 | 26 | 27 | 16 | 10 | 6 | 12 | 13 | 11 | 4 | 7 | 14 | 10 | 6 | 7 | 15 |
| *Chela cachius* | 14 | 10 | 13 | 10 | 9 | 5 | 4 | 7 | 6 | 3 | 2 | 1 | 2 | 3 | 4 | 8 | 11 |
| *Salmostoma phulo* | 14 | 21 | 28 | 19 | 17 | 12 | 16 | 6 | 8 | 9 | 8 | 6 | 3 | 6 | 2 | 13 | 10 |
| *Salmostoma bacaila* | 29 | 29 | 41 | 30 | 20 | 18 | 17 | 10 | 9 | 13 | 12 | 7 | 16 | 9 | 10 | 11 | 17 |
| *Devario devario* | 11 | 9 | 13 | 15 | 8 | 5 | 3 | 4 | 6 | 2 | 3 | 6 | 4 | 7 | 3 | 6 | 7 |
| *Labeo rohita* | 2 | 5 | 4 | 2 | 2 | 2 | 1 | 0 | 1 | 0 | 1 | 1 | 0 | 0 | 3 | 2 | 4 |
| *Labeo gonius* | 0 | 1 | 2 | 0 | 1 | 1 | 0 | 0 | 0 | 1 | 0 | 1 | 0 | 0 | 0 | 0 | 1 |
| *Labeo calbasu* | 0 | 2 | 1 | 1 | 0 | 0 | 1 | 1 | 0 | 0 | 0 | 0 | 1 | 0 | 0 | 1 | 0 |
| *Labeo bata* | 0 | 1 | 3 | 1 | 0 | 1 | 1 | 0 | 0 | 0 | 0 | 1 | 0 | 0 | 1 | 0 | 1 |
| *Gibelion catla* | 2 | 4 | 3 | 1 | 2 | 1 | 1 | 2 | 0 | 1 | 0 | 0 | 2 | 1 | 2 | 0 | 2 |
| *Cirrhinus cirrhosus* | 0 | 1 | 3 | 2 | 1 | 2 | 0 | 1 | 1 | 0 | 0 | 0 | 0 | 1 | 1 | 0 | 1 |
| *Osteobrama cotio* | 3 | 4 | 5 | 6 | 3 | 2 | 3 | 1 | 2 | 3 | 0 | 1 | 1 | 1 | 2 | 3 | 2 |
| *Amblypharyngodon mola* | 24 | 32 | 34 | 37 | 13 | 14 | 11 | 14 | 10 | 7 | 10 | 9 | 11 | 15 | 13 | 8 | 18 |
| *Hypophthalmichthys molitrix* | 0 | 2 | 2 | 1 | 1 | 1 | 1 | 0 | 0 | 0 | 0 | 1 | 0 | 0 | 0 | 1 | 2 |
| *Lepidocephalichthys guntea* | 31 | 30 | 39 | 36 | 25 | 17 | 12 | 11 | 15 | 18 | 21 | 14 | 17 | 9 | 12 | 6 | 9 |
| *Otolithoides pama* | 49 | 18 | 14 | 27 | 39 | 17 | 14 | 11 | 15 | 10 | 9 | 12 | 16 | 10 | 8 | 14 | 11 |
| *Eleotris fusca* | 2 | 3 | 4 | 3 | 2 | 2 | 1 | 2 | 0 | 1 | 0 | 0 | 2 | 1 | 0 | 2 | 3 |
| *Odontamblyopus rubicundus* | 34 | 37 | 35 | 38 | 26 | 12 | 15 | 12 | 17 | 19 | 8 | 16 | 17 | 12 | 21 | 11 | 10 |
| *Apocryptes bato* | 28 | 32 | 21 | 29 | 29 | 7 | 12 | 9 | 15 | 18 | 12 | 11 | 17 | 8 | 9 | 11 | 10 |
| *Glossogobius giuris* | 10 | 11 | 14 | 13 | 12 | 5 | 6 | 3 | 7 | 5 | 6 | 2 | 8 | 4 | 3 | 7 | 4 |
| *Pseudapocryptes elongates* | 25 | 22 | 29 | 28 | 21 | 9 | 12 | 11 | 15 | 8 | 3 | 7 | 3 | 8 | 18 | 16 | 15 |
| *Taenioides cirratus* | 43 | 51 | 56 | 48 | 36 | 25 | 17 | 21 | 19 | 17 | 15 | 16 | 13 | 19 | 24 | 20 | 28 |
| *Chitala chitala* | 4 | 3 | 4 | 6 | 2 | 2 | 3 | 1 | 0 | 2 | 1 | 3 | 0 | 0 | 4 | 2 | 1 |
| *Notopterus notopterus* | 6 | 13 | 14 | 11 | 7 | 5 | 3 | 7 | 2 | 1 | 3 | 5 | 3 | 7 | 5 | 4 | 6 |
| *Chanda nama* | 18 | 17 | 20 | 19 | 15 | 9 | 14 | 8 | 5 | 7 | 6 | 6 | 6 | 5 | 8 | 7 | 8 |
| *Pseudambassis lala* | 14 | 10 | 13 | 12 | 6 | 5 | 2 | 7 | 5 | 6 | 4 | 3 | 6 | 7 | 5 | 3 | 2 |
| *Parambassis ranga* | 3 | 8 | 6 | 5 | 8 | 3 | 5 | 5 | 4 | 3 | 0 | 2 | 0 | 2 | 1 | 1 | 4 |
| *Mystus vittatus* | 26 | 29 | 38 | 35 | 18 | 14 | 18 | 11 | 16 | 12 | 8 | 13 | 18 | 10 | 6 | 11 | 9 |
| *Mystus cavasius* | 5 | 2 | 2 | 1 | 3 | 2 | 1 | 3 | 0 | 1 | 0 | 2 | 1 | 0 | 0 | 2 | 1 |
| *Mystus bleekeri* | 15 | 9 | 8 | 13 | 14 | 11 | 5 | 9 | 4 | 7 | 2 | 5 | 2 | 2 | 3 | 5 | 4 |
| *Sperata aor* | 2 | 4 | 6 | 3 | 4 | 3 | 2 | 3 | 1 | 0 | 2 | 1 | 0 | 0 | 2 | 3 | 2 |
| *Rita rita* | 2 | 5 | 4 | 5 | 3 | 4 | 1 | 1 | 2 | 1 | 0 | 2 | 1 | 0 | 2 | 2 | 3 |
| *Heteropneustes fossilis* | 5 | 4 | 5 | 3 | 4 | 2 | 1 | 2 | 1 | 1 | 1 | 2 | 3 | 2 | 2 | 1 | 3 |
| *Pangasius pangasius* | 8 | 7 | 5 | 6 | 7 | 3 | 2 | 4 | 2 | 1 | 5 | 3 | 2 | 6 | 2 | 1 | 2 |
| *Silonia silondia* | 28 | 11 | 13 | 20 | 23 | 10 | 5 | 8 | 3 | 5 | 8 | 7 | 9 | 14 | 11 | 7 | 8 |
| *Ailia coila* | 18 | 15 | 21 | 28 | 16 | 8 | 11 | 6 | 9 | 10 | 11 | 8 | 6 | 7 | 6 | 9 | 7 |
| *Clupisoma garua* | 25 | 18 | 16 | 12 | 20 | 12 | 10 | 4 | 5 | 8 | 9 | 3 | 7 | 7 | 10 | 7 | 9 |
| *Wallago attu* | 7 | 5 | 8 | 4 | 6 | 3 | 4 | 2 | 4 | 3 | 2 | 3 | 2 | 2 | 3 | 0 | 2 |
| *Ompok pabda* | 4 | 2 | 3 | 2 | 2 | 2 | 3 | 0 | 1 | 0 | 1 | 0 | 3 | 2 | 0 | 0 | 1 |
| *Plotosus canius* | 6 | 2 | 0 | 1 | 1 | 3 | 1 | 2 | 1 | 0 | 0 | 1 | 1 | 0 | 0 | 1 | 0 |
| *Mastacembelus armatus* | 4 | 7 | 8 | 9 | 5 | 3 | 2 | 1 | 2 | 3 | 6 | 4 | 3 | 4 | 2 | 1 | 2 |
| *Macrognathus aral* | 12 | 15 | 18 | 22 | 9 | 5 | 8 | 4 | 5 | 7 | 8 | 6 | 9 | 11 | 4 | 6 | 3 |
| *Macrognathus aculeatus* | 4 | 3 | 6 | 4 | 2 | 2 | 1 | 3 | 2 | 1 | 1 | 0 | 2 | 4 | 1 | 0 | 2 |
| *Monopterus cuchia* | 1 | 2 | 2 | 4 | 3 | 1 | 1 | 2 | 0 | 2 | 2 | 1 | 2 | 0 | 0 | 1 | 0 |
| *Leiodon cutcutia* | 8 | 11 | 9 | 8 | 7 | 5 | 3 | 2 | 3 | 4 | 2 | 7 | 5 | 4 | 3 | 2 | 3 |
| **Total** | **1115** | **962** | **1026** | **1064** | **951** | **504** | **466** | **449** | **424** | **412** | **355** | **375** | **397** | **387** | **416** | **412** | **521** |
